# Supplementary material for: Three-dimensional magnetic resonance imaging of fetal head molding and brain shape changes during the second stage of labor
Source: PLoS One. 2019 May 15;14(5):e0215721. doi: 10.1371/journal.pone.0215721 (PMC6519794; doi:10.1371/journal.pone.0215721)
Supplement: S1 dataset — (XLSX) [file pone.0215721.s001.xlsx]

## Sheet: anonymous results
Patient_num	AGE	Number of children	number of pregnancies	Term in WA	MRI duration (min)	Days between MRI and childbirth	Days between both MRIs	Hour of childbirth	Delivery mode	Delay between 4 cm cervix dilation and childbirth (hours)	Stagnation	Newborn weight (g)	Newborn gender	HC measured after delivery	Magnin before	Magnin during	Newborn height	APGAR 1	APGAR 5	APGAR 10	Liquid	FHR	MANŒUVERS	Length of stay	Perineum	PRP before	PRP during	TM before	TM during	BS before	BS during	SCSP before	SCSP during	Delta SCSP	DIETZ before	DIETZ during	Delta DIETZ	DIETZ angle before	DIETZ angle during	Delta DIETZ angle	BIP before	BIP during	Delta BIP	HC before	HC during	Delta HC	FOD before	FOD during	Delta FOD
Patient_1	23	1	1	40.3	6	77	5	16:13:00	anatomic	9	obstructed labor	3380	F	34.5	25.14	25.137	51	10	10	10	clear	normal	no	J4	intact	127.15	127.13	124.25	124.24	99.27	98.1	86.78	96.07	9.29	-3.93	23.44	27.37	-2	19.6	21.6	84.37	84.5	-0.13	349	320	29	117.43	105.79	11.64
Patient_2	28	2	2	41.4	7	86	0	18:36:00	anatomic	5	no	4000	F	36	26.769	26.778	53	10	10	10	clear	normal	no	J4	scratches	124.93	124.99	142.76	142.79	131.51	131.55	100	90	-10	-8.28	14.79	23.07	-6.2	11.4	17.6	116.58	107.35	9.23	379	360	19	116.58	107.35	9.23
Patient_3	28	1	1	41.9	6	59	0	20:28:00	c-section at complete dilation	7	3h at complete dilation	3755	F	35.5	26.195	26.173	55	10	10	10	stained	normal	no	J5	intact	134.47	134.29	127.48	127.44	97.3	97.28	98.18	87.81	-10.37	-19.22	11.93	31.15	-16.3	10.2	26.5	97.06	93.12	3.94	358.43	338.14	20.29	113.45	100.24	13.21
Patient_4	31	2	2	41.4	8	28	0	19:54:00	anatomic	4	no	4525	M	36.5	25.184	25.181	54	4	7	10	clear	normal	no	J4	simple tear	120.7	120.66	131.14	131.15	129.88	129.86	97.17	107.21	10.04	-17.54	36.25	53.79	-15.3	33.2	48.5	97.02	91.15	5.87	378.38	348.29	30.09	116.36	101.2	15.16
Patient_5	31	2	2	39.3	7	115	16	01:29:00	anatomic	4	no	3095	F	34.5	27.581	27.48	49	10	10	10	clear	normal	no	J3	intact	134.71	134.49	141.1	140.31	129.04	130.65	88.46	77.43	-11.03	-9.93	20.63	30.56	-8.3	15.9	24.2	78.19	76.43	1.76	312.7	317.82	-5.12	102.52	96.86	5.66
Patient_6	34	3	3	39.4	12	56	0	23:02:00	anatomic	3	no	4145	M	37	27.192	27.182	52	10	10	10	clear	normal	no	J3	simple tear	130.32	130.32	141.6	141.5	141.1	141.1	80.86	80.36	-0.5	-11.6	18.31	29.91	-10.3	15.8	26.1	100.37	100.33	0.04	375.38	375.32	0.06	113.5	115.33	-1.83
Patient_7	24	1	2	41	11	65	0	00:15:00	c-section at complete dilation	9	4h at complete dilation	3625	M	35.5	25.688	25.678	51	10	10	10	meconial	normal	spatulas fail	J4	intact	127.42	127.32	129.46	129.46	110.59	110.98	75.24	73.9	-1.34	-11.6	13.94	25.54	-12	13.3	25.3	83.5	81.22	2.28	346.93	323.25	23.68	106.98	93.67	13.31
Median	28	2	2	41	8		0			5		3755		35.5	26.195	26.173	52	10	10	10						127.42	127.32	131.14	131.15	129.04	129.86	88.46	87.81	-1.34	-11.6	18.31	29.91	-10.3	15.8	25.3
